[Download Table S1](#)

[Download Table S2](#)

[Download Table S3](#)

[Download Table S4](#)

[Download Table S5](#)

[Download Table S6](#)

[Download Table S7](#)

[Download Table S8](#)

[Download Table S9](#)

[Download Table S10](#)

[Download Table S11](#)

[Download Table S12](#)

**Table S13. Primers**

| <b>Primer</b>                                   | <b>Sequence (5'-3')</b>                                                                |
|-------------------------------------------------|----------------------------------------------------------------------------------------|
| <b>Polyadenylation assay</b>                    |                                                                                        |
| p1                                              | p-GGTCACCTTGATCTGAAGC-NH2                                                              |
| p2                                              | GCTTCAGATCAAGGTGACCTTTTT                                                               |
| <i>polb</i> gene-specific primer                | AATCCCTCGTTCAGAGATGC                                                                   |
| <b>RT-PCR</b>                                   |                                                                                        |
| <i>C18H16orf7</i>                               | TGTCCCATCTCTCCACATCA, GTGAGAAGGAACCCAGTCCA                                             |
| <i>cyclin B1</i>                                | TCCATGTTCCCTCCGTCTCTC, CATGTGCATCTGCTTCTGGT                                            |
| <i>CFP</i>                                      | ACGTAAACGGCCACAGGTTT, AAGTCGTGCTGCTTCATGTG                                             |
| <b><i>sox19b</i> 3' UTR cloning/mutagenesis</b> |                                                                                        |
| Fragment 1                                      | tatctagaCATACCATGTGACCTCTAGTG,<br>tagcggccgcTTGCGTTGTCATTTTTTTTATT                     |
| Fragment 2                                      | tatctagaCATACCATGTGACCTCTAGTG,<br>tagcggccgcGTCAAATTTAATTCTGACAGC                      |
| Fragment 3                                      | tatctagaTFACTGAACACTTCTGATTGT,<br>tagcggccgcCTCACTATTTATTTGAAGGAG                      |
| Fragment 4                                      | tatctagaTTCCCTCTTAAGGGCTAAACT,<br>tagcggccgcTTGCGTTGTCATTTTTTTTATT                     |
| Fragment 3 mutagenesis                          | TTCTAAATTCATATGTTTTTTATTATAATTATAAACAGTG,<br>CACTGTTTATAATTATAATAAAAAACATATGAATTTAGGAA |
